# Supplementary material
Source: MDPI journal article supplement (https://www.mdpi.com/2227-9717/5/3/44)
Supplement: s1 [file s1]

## Sheet: As-Reported Fuel Prices
Supplementary Material for "CO2 Capture Approaches for Fossil-Based Power Generation: Review and Meta-Study" in the journal Processes
by Adams TA II, Hoseinzade L, Madabhushi PB, Okeke IJ (2017)				Please cite original paper when referring to this material
McMaster University				VERSION 2, UPDATED DECEMBER 20, 2017
USES "AS-REPORTED" FUEL PRICES				Capacity	Efficiency	Heat Rate	LCOE			Non-Fuel Costs				Fuel Unit Prices			Fuel Costs			Greenhouse Gas Emissions			Calculated CCA		As Reported CCA (Nonstandard Reference )
Tag	Ref	As-Reported Project Year and Local Currency Unit (LCU)	Plant Type	As-Reported Plant Capacity (Net Output) in MW	As-Reported Electrical Efficiency (%HHV)	Heat Rate (MJ/MWh)	As-Reported LCOE in Project Year (LCU/MWh)	As-Reported LCOE converted to $US for same project year ($US/MWh)	Calculated LCOE at Standard Conditions ($US2016/MWh)	As-Reported Non-Fuel Cost in Project Year (LCU/MWh)	Non-Fuel Cost Localized to North America using PPP at As-Reported Capacity in Project Year ($US/MWh)	Non-Fuel Cost Localized to North America using PPP at Standard Capacity in Project Year ($US/MWh)	Non-Fuel Cost Localized to North America at Standard Capacity in 2016 ($US2016/MWh)	As-Reported Fuel Unit Price in Project Year (LCU/GJ)	Fuel Unit Price Localized to North America in Project Year ($US/GJ)	Fuel Unit Prices Localized to North America in 2016 ($US2016/GJ)	As-Reported Fuel Cost in Project Year (LCU/MWh)	As-Reported Fuel Cost Localized to North America in Project Year ($/MWh)	Fuel Cost Localized to North America in 2016 ($US2016/MWh)	Percentage of CO2 Removed	Direct Greenhouse Gas Emissions (tCO2e/MWh)	Total Cradle-To-Gate Exit Greenhouse Gas Emissions (tCO2e/MWh)	CCA vs SCPC w/o CO2 Capture ($US2016/tCO2e)	CCA vs NGCC w/o CO2 Capture ($US2016/tCO2e)	As-Reported CCA in Project Year (LCU/tCO2e)	As-Reported CCA in US Currency and Project Year ($/tCO2e)	As-Reported Reference Plant for CCA Calculation
SCPC-1	[6]	$2011	Solvent Based - EconFG+	550	32.5	11076.9	133.2	133.2	132.551	102.406	102.406	102.406	105.236	2.78	2.78	2.46594	30.7938	30.7938	27.315	90	0.191764	0.286442	78.1763	546.556	75.2198	75.2198	SCPC w/o CCS
SCPC-2	[66]	$2013	Solvent Based	525	27.4	13138.7	129.5	129.5	125.318	98.8869	98.8869	98.4279	97.5829	2.33	2.33	2.11094	30.6131	30.6131	27.735	90	0.214764	0.327065	71.6038	678.705	70	70	SCPC w/o CCS
SCPC-3	[66,67]	€2010	Solvent Based - Adv.amine	837	36.1	9972.3	68.7	91.178	85.7631	43.5698	56.4597	58.8809	61.6437	2.52	2.58978	2.41864	25.1302	25.826	24.1194	90	0.189764	0.275	6.94157	225.762	29.8	39.5503	SCPC w/o CCS
SCPC-4	[68]	€2013	Solvent Based - Cansolv	822	33.8	10650.9	86.3	114.618	105.514	60.8444	76.2992	79.4275	78.7456	2.39	2.77404	2.51324	25.4556	29.546	26.7682	90	0.187764	0.278801	36.6561	353.335	52.53	69.7667	SCPC w/o CCS
SCPC-5	[69]	$2010	Solvent Based - Amine	546	27.2	13235.3	122	122	123.754	87.4559	87.4559	87.3921	91.4926	2.61	2.61	2.43753	34.5441	34.5441	32.2615	90	0.210164	0.32329	68.6508	643.461	78	78	SCPC w/o CCS
SCPC-6	[66,70]	€2010	Solvent Based - Adv.Amine	616	36.5	9863.01	70.3	93.3015	84.5158	47.6151	59.2558	59.9312	62.7432	2.3	2.36368	2.20749	22.6849	23.313	21.7725	90	0.186764	0.271066	5.04838	213.147	33.3	44.1954	SCPC w/o CCS
SCPC-7	[71]	$2006	Solvent based-Chilled Ammonia	548.7	28.4	12676.1	80.8	80.8	100.598	64.1944	64.1944	64.1792	79.7668	1.31	1.31	1.64331	16.6056	16.6056	20.8307	90	0.205364	0.31371	30.8898	411.919	36.97	36.97	SCPC w/o CCS
SCPC-8	[71]	$2006	Solvent based-Chilled Ammonia	549.3	31.5	11428.6	74.7	74.7	93.0065	59.7286	59.7286	59.721	74.2258	1.31	1.31	1.64331	14.9714	14.9714	18.7807	90	0.194464	0.292148	18.2298	300.762	28.98	28.98	SCPC w/o CCS
SCPC-9	[15,76]	$2007	Solvent based-Chilled Ammonia	558.7	27.9	12903.2	100.7	100.7	102.443	79.2483	79.2483	79.3727	76.7495	1.66251	1.66251	1.99125	21.4517	21.4517	25.6936	90	0.214764	0.325052	34.4354	468.448	69.45	69.45	SCPC w/o CCS
SCPC-10	[12]	€2008	Solvent based-Chilled Ammonia	614	36.6	9836.07	82.3	121.042	104.312	52.8	67.3732	68.119	68.5691	2.99917	3.54813	3.63384	29.5	34.8997	35.7427	88.4	0.191864	0.275936	34.7008	339.868	38.6	56.7706	U-SCPC w/o CCS
SCPC-11	[72]	£2011	Solvent Based-Amine	519	25.6	14062.5	102	163.595	135.85	74.2969	105.229	104.62	107.511	1.97	2.27193	2.01527	27.7031	31.949	28.3397	94	0.170764	0.290961	83.7667	585.177	59	94.6283	SCPC w/o CCS
IGCC-1	[73]	$2011	Solvent Based-Selexol	543	32.6	11042.9	135.4	135.4	134.687	104.701	104.701	104.567	107.456	2.78	2.78	2.46594	30.6994	30.6994	27.2313	90	0.14664	0.241028	76.1659	432.741	78.3372	78.3372	IGCC w/o CCS
IGCC-2	[73]	$2011	Solvent Based-Selexol	513	31	11612.9	141.9	141.9	140.5	109.616	109.616	108.855	111.863	2.78	2.78	2.46594	32.2839	32.2839	28.6367	90	0.15164	0.250899	85.6323	485.974	88.6	88.6	IGCC w/o CCS
IGCC-3	[73]	$2011	Solvent Based-Selexol	497	31.2	11538.5	152.6	152.6	151.058	120.523	120.523	119.308	122.605	2.78	2.78	2.46594	32.0769	32.0769	28.4532	90	0.15264	0.251263	100.91	542.747	103	103	IGCC w/o CCS
IGCC-4	[66]	$2013	Data not available	500	29.9	12040.1	130	130	125.529	101.946	101.946	100.979	100.113	2.33	2.33	2.11094	28.0535	28.0535	25.416	86	0.20364	0.306551	69.6312	576.217	45	45	IGCC w/o CCS
IGCC-5	[69]	$2010	Solvent Based-Selexol NS	694	32	11250	113	113	117.044	83.6375	83.6375	85.6053	89.622	2.61	2.61	2.43753	29.3625	29.3625	27.4222	90	0.14464	0.240797	51.0647	343.827	57.153	57.153	IGCC w/o CCS
IGCC-6	[72]	£2011	Solvent Based - Shift + Selexol	455	35.1	10256.4	79.7	127.828	105.635	59.4949	84.2642	82.6814	84.966	1.97	2.27193	2.01527	20.2051	23.3018	20.6694	94	0.10964	0.197305	32.8201	235.355	25.4	40.7383	IGCC w/o CCS
CMEM-1	[74,76]	$2010	Membrane - 2 stage	550	25.7	14007.8	112	112	113.662	80.2023	80.2023	80.2023	83.9655	2.27	2.27	2.12	31.7977	31.7977	29.6965	90	0.216764	0.336493	53.5397	628.087	78	78	SCPC w/o CCS
CMEM-2	[75]	€2008	Membrane - 3 stage	754.3	33	10909.1	94	138.25	122	81.6494	99.5238	102.718	103.396	1.13213	1.66508	1.70529	12.3506	18.1645	18.6032	90	0.199464	0.292708	62.7368	498.285	53	77.9492	SCPC/ MEA CCS
CMEM-3	[74,76]	$2010	Membrane- Two stage two step with air sweep	550	25.7	14007.8	94.1	94.1	94.3444	57.1895	57.1895	57.1895	59.873	2.635	2.635	2.46088	36.9105	36.9105	34.4714	90	0.218864	0.338593	21.8361	451.196	30.7	30.7	SCPC w/o CCS
CMEM-4	[77,78]	$2007	H2-CO2 selective membrane with sweep gas	556	31	11612.9	90.48	90.48	92.1468	70.6219	70.6219	70.6986	68.362	1.71	1.71	2.04814	19.8581	19.8581	23.7848	90	0.145973	0.245233	15.7768	224.036
CMEM-5	[77,78,79]	$2007	2 stages membrane with argon as sweep gas (Amine-containing - membranes synthesized and tested)	550	31	11612.9	100	100	101.278	80.1419	80.1419	80.1419	77.4932	1.71	1.71	2.04814	19.8581	19.8581	23.7848	90	0.145973	0.245233	28.8376	270.836
CMEM-6	[80]	€2015	Cascade Membrane system- polymeric	439.1	34.782	10350.2	85.9	95.3542	99.1878	53.0485	68.6371	67.1088	66.2408	3.174	3.33338	3.18323	32.8515	34.5011	32.947	90	0.220064	0.30853	28.4211	385.037	44.7	49.6197	SCPC w/o CCS
CMEM-7	[80]	€2015	3 end membrane integration- ceramic	491.6	38.9021	9253.99	77.3	85.8076	89.984	47.9278	62.0118	61.3195	60.5265	3.174	3.33338	3.18323	29.3722	30.8471	29.4575	90	0.178164	0.257261	12.9053	226.942	31.5	34.9669	SCPC w/o CCS
CMEM-8	[80]	€2015	Microporous ceramic membrane - H2 selective	295.3	36.5067	9861.21	84.1	93.356	94.7571	52.8005	68.3163	64.197	63.3667	3.174	3.33338	3.18323	31.2995	32.8711	31.3905	90	0.14964	0.233927	19.2	224.411	36.6	40.6282	IGCC w/o CCS
CMEM-9	[80]	€2015	Microporous ceramic membrane - soar WGS membrane	316	38.9021	9253.99	80.6	89.4708	91.3548	51.2278	66.2815	62.7082	61.8972	3.174	3.33338	3.18323	29.3722	30.8471	29.4575	90	0.13824	0.217337	14.0821	192.46	30.5	33.8568	IGCC w/o CCS
CMEM-10	[81]	€2015	Integrated WGS membrane reactor	219.4	32	11250	86	95.4652	102.533	63.5012	87.3866	79.7136	78.6826	1.99989	2.22	2.12	22.4988	24.975	23.85	81	0.23464	0.330797	34.9038	493.835	47.1	52.2838	IGCC w/o CCS
CMEM-11	[82]	€2015	Two stages membrane	350	24.9	14457.8	110	122.107	126.719	75.3012	97.429	93.1234	91.919	2.4	2.52051	2.40698	34.6988	36.4411	34.7996	90	0.227764	0.35134	76.8969	879.554
CMEM-12	[83]	€2014	Membrane- cryogenic	427.409	33.82	10644.6	65.5	87.0187	83.686	49.5331	64.6157	63.0066	61.1195	1.5	2.37	2.12	15.9669	25.2277	22.5665	90	0.193065	0.284048	3.89103	225.541	48.24	64.0883	SCPC w/o CCS
CCRY-1	[16]	€2012	Cryogenic	699	33.0572	10890.2	99.7	138.815	124.323	74.4347	88.4694	90.6159	93.1198	2.32	3.23021	2.86529	25.2653	35.1776	31.2036	90	0.192764	0.192764	57.486	306.521	34.5	48.0354	SCPC w/o CCS
COXY-1	[84]	€2015	Oxy-fuel	376.06	34.31	10492.6	70.06	77.7708	50.6043	46.9764	28.891	27.8133	27.4536	2.2	2.31047	2.20639	23.0836	24.2428	23.1507	91	0.07069	0.160373	-38.9191	7.7488	33.9	37.631	SCPC w/o CCS
COXY-2	[84]	€2015	Oxy-fuel	352.9	32.2	11180.1	88.54	98.2847	61.8005	63.9437	39.3262	37.6193	37.1328	2.2	2.31047	2.20639	24.5963	25.8313	24.6678	90	0.08262	0.17818	-25.2108	50.982	60.21	66.8367	SCPC w/o CCS
COXY-3	[85]	€2012	Oxy-fuel	670.28	34.72	10368.7	71.7	92.194	86.8234	55.8039	70.885	72.3009	72.6402	1.53309	1.53565	1.36789	15.8961	15.9226	14.1832	94	0.04769	0.136314	7.06228	126.266	33.7	43.3325	SCPC w/o CCS
COXY-4	[85]	€2012	Oxy fuel with 10% air added	669.27	34.67	10383.6	71.4	91.8083	86.4126	55.481	70.4748	71.8717	72.2089	1.53309	1.53565	1.36789	15.919	15.9456	14.2037	94	0.04776	0.136512	6.55552	124.996	33.3	42.8181	SCPC w/o CCS
COXY-5	[85]	€2012	Oxy fuel with 20% air added	666.23	34.51	10431.8	71.3	91.6797	86.2195	55.3072	70.254	71.6139	71.95	1.53309	1.53565	1.36789	15.9928	16.0195	14.2695	94	0.04798	0.137144	6.32141	124.619	33.2	42.6896	SCPC w/o CCS
COXY-6	[85]	€2012	Oxy fuel with 30% air added	661.18	34.25	10510.9	71.4	91.8083	86.2452	55.2858	70.2268	71.5317	71.8674	1.53309	1.53565	1.36789	16.1142	16.1411	14.3778	94	0.04835	0.13819	6.36158	125.136	33.4	42.9467	SCPC w/o CCS
COXY-7	[85]	€2012	Oxy fuel with 40% air added	654.12	33.88	10625.7	71.7	92.194	86.4862	55.4098	70.3844	71.6153	71.9513	1.53309	1.53565	1.36789	16.2902	16.3174	14.5348	94	0.04887	0.139692	6.67289	126.563	33.8	43.4611	SCPC w/o CCS
COXY-8	[85]	€2012	Oxy fuel with 50% air added	645.05	33.41	10775.2	72.5	93.2227	87.3305	55.9806	71.1095	72.2521	72.5912	1.53309	1.53565	1.36789	16.5194	16.547	14.7393	94	0.04956	0.141659	7.74105	130.223	34.9	44.8755	SCPC w/o CCS
COXY-9	[86]	€2007	Oxy-fuel	238.53	32.29	11149	57.5	78.8187	67.5404	45.2361	62.8896	57.8492	55.9372	1.1	0.868921	1.04074	12.2639	9.68757	11.6032	90	0.1357	0.230994	-19.0311	91.2613	22	30.1567	SCPC w/o CCS
COXY-10	[87]	$2009	Oxy-fuel	533.2	32.74	10995.7	82.3	82.3	84.7588	61.2282	61.2282	61.0386	64.5451	1.91636	1.91636	1.83832	21.0718	21.0718	20.2136	93	0.0528	0.146784	4.56643	123.736	37.9	37.9	SCPC w/o CCS
COXY-11	[88]	€2014	Oxy-fuel with compression and dehydration	310	33.81	10647.7	116.3	154.508	136.972	97.6665	127.405	120.306	116.703	1.75	2.12808	1.9036	18.6335	22.6592	20.269	100	0	0.0910096	65.4534	253.445	70.97	94.2858	OXY-Fuel w/o CCS
COXY-12	[88]	€2014	Oxy-fuel with double flash purification	270.6	29.51	12199.3	133.5	177.359	155.424	112.151	146.301	136.284	132.202	1.75	2.12808	1.9036	21.3487	25.961	23.2225	92	0.0845	0.188771	98.3428	425.281	103.52	137.529	OXY-Fuel w/o CCS
COXY-13	[88]	€2014	Oxy-fuel with distillation purification	265.8	28.99	12418.1	139.8	185.728	162.567	118.068	154.02	143.217	138.928	1.75	2.12808	1.9036	21.7316	26.4266	23.639	90	0.1075	0.213641	111.465	503.443	116.1	154.242	OXY-Fuel w/o CCS
COXY-14	[89]	€2009	Oxy-fuel	574	36.6	9836.07	67.2	93.6983	83.6862	51.5402	59.7978	60.0538	63.5038	1.59208	2.13899	2.05188	15.6598	21.0392	20.1824	90	0.119	0.203072	3.46627	148.569	46.2	64.4176	SCPC w/o CCS
COXY-15	*	$2007	Oxy-fuel (Case: S12F)	550	31	11612.9	96	96	94.7578	87.6349	87.6349	87.6349	84.7386	0.720328	0.720328	0.862766	8.3651	8.3651	10.0192	90.8	0.0975225	0.196782	18.2469	190.189	48.72	48.72	SCPC w/o CCS
COXY-16	*	$2007	Oxy-fuel (Case: S22F)	549	30.1	11960.1	106.9	106.9	105.338	98.2848	98.2848	98.2669	95.0192	0.720328	0.720328	0.862766	8.61522	8.61522	10.3188	90.9	0.09888	0.201107	32.5879	237.853	63.16	63.16	SCPC w/o CCS
COXY-17	[66]	$2013	Oxy-fuel (Boiler type & Coal rank: USC-subbit)	509	31.5	11428.6	119.8	119.8	116.282	99.5714	99.5714	98.803	97.9548	1.77	1.77	1.60359	20.2286	20.2286	18.3267	90	0.105	0.202684	47.4122	285.478	73	73	SCPC w/o CCS
COXY-18	[66]	$2013	Oxy-fuel (Boiler type & Coal rank: SCPC-bit)	501	31	11612.9	121.4	121.4	117.673	100.845	100.845	99.9085	99.0508	1.77	1.77	1.60359	20.5548	20.5548	18.6223	98	0.021	0.120259	44.3588	216.313	67	67	SCPC w/o CCS
COXY-19	[66]	$2013	Oxy-fuel (Boiler type & Coal rank: SCPC-bit)	510	31.5	11428.6	118.7	118.7	115.218	98.4714	98.4714	97.7307	96.8917	1.77	1.77	1.60359	20.2286	20.2286	18.3267	90	0.105	0.202684	45.9788	281.005	71	71	SCPC w/o CCS
COXY-20	[68]	€2013	Oxy-fuel (Boiler type & Coal rank: USC-subbit)	833	34.1	10557.2	83.37	110.726	104.15	58.1383	75.106	78.2893	77.6172	2.39	2.77404	2.51324	25.2317	29.2861	26.5327	90	0.092	0.182236	30.2222	215.86	48.2159	64.037	SCPC w/o CCS
COXY-21	[90]	$2007	Oxy-combustion Supercritical PC with CO2 Capture	550	29.3	12286.7	100.7	100.7	102.21	79.738	79.738	79.738	77.1027	1.70607	1.70607	2.04343	20.962	20.962	25.107	99.5	0	0.105018	25.1302	160.366	42.6	42.6	SCPC w/o CCS
COXY-22	[90]	$2007	Oxy-combustion Supercritical PC with CO2 Capture	555.1	29.5	12203.4	99.8	99.8	101.377	78.9802	78.9802	79.0531	76.4404	1.70607	1.70607	2.04343	20.8198	20.8198	24.9368	99.4	0	0.104306	24.1178	157.549	41.5	41.5	SCPC w/o CCS
COXY-23	[90]	$2007	Oxy-combustion Supercritical PC with CO2 Capture	549	29.3	12286.7	101.8	101.8	103.259	80.838	80.838	80.8233	78.1521	1.70607	1.70607	2.04343	20.962	20.962	25.107	96.9	0.026762	0.13178	27.2493	177.676	45.3	45.3	SCPC w/o CCS
COXY-24	[90]	$2007	Oxy-combustion Supercritical PC with CO2 Capture	548.7	29.2	12328.8	102.6	102.6	104.045	81.5663	81.5663	81.547	78.8518	1.70607	1.70607	2.04343	21.0337	21.0337	25.193	85.5	0.0762036	0.181582	30.0584	214.907	49.4	49.4	SCPC w/o CCS
COXY-25	[90]	$2007	Oxy-combustion Ultra-supercritical PC with CO2 Capture	550	33	10909.1	95.9	95.9	97.0259	77.2883	77.2883	77.2883	74.7339	1.70607	1.70607	2.04343	18.6117	18.6117	22.292	99.4	0	0.0932435	18.692	139.991	37.1	37.1	SCPC w/o CCS
COXY-26	[90]	$2007	Oxy-combustion Ultra-supercritical PC with CO2 Capture	545.3	32.7	11009.2	98.6	98.6	99.6098	79.8176	79.8176	79.7491	77.1134	1.70607	1.70607	2.04343	18.7824	18.7824	22.4965	93.2	0.0598743	0.153973	23.3974	178.702	43.4	43.4	SCPC w/o CCS
IGFC-1	[44]	$2011	Uses WGS to minimize CO content in SOFC feed	719	42	8571.43	78	78	79.9483	63.8542	63.8542	65.5882	67.4005	1.65035	1.65035	1.46391	14.1458	14.1458	12.5478	100	0	0.0732628	-1.34131	85.8486
IGFC-2	[44]	$2011	IGFC-1 but with seasonal SOFC shutdowns to preserve life during low-demand deasons	719	42	8571.43	78.8	78.8	80.7927	64.6542	64.6542	66.41	68.2449	1.65035	1.65035	1.46391	14.1458	14.1458	12.5478	100	0	0.0732628	-0.371929	88.149
IGFC-3	[44]	$2011	IGFC-1 with integrated energy storage	719	41.5	8674.7	81.5	81.5	83.6139	67.1837	67.1837	69.0082	70.915	1.65035	1.65035	1.46391	14.3163	14.3163	12.6989	100	0	0.0741454	2.86967	96.0656
IGFC-4	[44]	$2011	IGFC-2 with integrated energy storage	719	40.6	8867	82.4	82.4	84.5104	67.7664	67.7664	69.6067	71.53	1.65035	1.65035	1.46391	14.6336	14.6336	12.9804	100	0	0.0757891	3.90725	98.9579
IGFC-5	[44]	$2011	Uses coal syngas directly in SOFC with no WGS	719	38.4	9375	80.8	80.8	82.6803	65.328	65.328	67.1021	68.9562	1.65035	1.65035	1.46391	15.472	15.472	13.7241	100	0	0.0801311	1.80925	95.07
IGFC-6	[44]	$2011	IGFC-5 with seasonal SOFC shutdowns	719	38.41	9372.56	81.4	81.4	83.3143	65.932	65.932	67.7225	69.5938	1.65035	1.65035	1.46391	15.468	15.468	13.7205	100	0	0.0801103	2.54278	96.8245
IGFC-7	[44]	$2011	IGFC-5 with integrated energy storage	719	38	9473.68	84.3	84.3	86.3472	68.6651	68.6651	70.5298	72.4787	1.65035	1.65035	1.46391	15.6349	15.6349	13.8686	100	0	0.0809746	6.05814	105.497
IGFC-8	[44]	$2011	IGFC-5 with integrated energy storage	719	37.4	9625.67	83.6	83.6	85.5661	67.7143	67.7143	69.5532	71.475	1.65035	1.65035	1.46391	15.8857	15.8857	14.0911	100	0	0.0822737	5.16117	103.698
IGFC-9	[91]	$2007	Atm-Pressure IGFC Plant	253	49.4	7287.45	88	88	82.5016	75.5673	75.5673	69.9213	67.6104	1.70604	1.70604	2.04339	12.4327	12.4327	14.8911	99	0.00136078	0.063649	1.57243	90.4357
IGFC-10	[91]	$2007	Pressurized IGFC	253	56.2	6405.69	79	79	73.9934	68.0716	68.0716	62.9857	60.904	1.70604	1.70604	2.04339	10.9284	10.9284	13.0893	99	0.00136078	0.0561123	-8.01947	66.5184
IGFC-11	[92]	$2007	Partially methanated Syngas IGFC (TREMP)	846.6	44.3638	8114.73	96.3	96.3	100.336	79.7459	79.7459	83.2607	80.5089	2.04	2.04	2.44339	16.5541	16.5541	19.8275	99	0.00272147	0.0720807	22.0337	140.936
IGFC-12	[92]	$2007	Partially methanated Syngas IGFC (HICOM)	925	48.4839	7425.14	84.8	84.8	89.0872	69.6527	69.6527	73.3696	70.9447	2.04	2.04	2.44339	15.1473	15.1473	18.1425	99	0.00630486	0.0697699	9.11336	109.701
IGFC-13	[92]	$2007	IGFC-DIRECT	865	45.3219	7943.17	90.6	90.6	94.6777	74.3959	74.3959	77.8421	75.2694	2.04	2.04	2.44339	16.2041	16.2041	19.4083	99	0.00674219	0.0746351	15.5921	126.447
IGFC-14	[93]	$2006	Liquid-tin anode SOFC	93.9	57.2	6293.71	71	71	75.8517	62.0522	62.0522	51.9981	64.6273	1.4217	1.4217	1.78343	8.94776	8.94776	11.2244	100	0	0.0537943	-5.91193	70.927
CaLC-1	[48]	€2005	CaO Looping	621	25.5834	14071.6	48.3	60.1113	104.637	27.1926	37.4625	37.9201	62.7497	1.5	2.16232	2.9767	21.1074	30.4273	41.887	85	0.187236	0.307511	36.9314	423.101	15.7	19.5393	SCPC w/o CCS
CaLC-2	[49]	€2009	CaO Looping w/o heat recovery	446	18.5887	19366.6	102	142.221	142.845	82.6334	113.842	111.48	117.885	1	1.34352	1.28881	19.3666	26.0194	24.9598	85	0.310428	0.475961	131.783	-2650.7	100.5	140.129	SCPC w/o CCS
CaLC-3	[49]	€2009	CaO Looping with Combined Cycle Design 1	594.8	24.242	14850.3	59.5	82.962	84.697	44.6497	61.5127	61.9963	65.5578	1	1.34352	1.28881	14.8503	19.9517	19.1392	85	0.282675	0.409605	6.69517	1179.69	36.8	51.311	SCPC w/o CCS
CaLC-4	[49]	€2009	CaO Looping with Combined Cycle Design 2	446	32.674	11018	71	98.9967	99.7704	59.982	82.6356	80.9216	85.5704	1	1.34352	1.28881	11.018	14.8029	14.2	85	0.231564	0.325738	30.1534	447.932	53.9	75.1538	SCPC w/o CCS
CaLC-5	[49]	€2009	CaO Looping with Combined Cycle Design 3	594.8	33.5363	10734.6	55.5	77.3848	79.5625	44.7654	61.672	62.1568	65.7277	1	1.34352	1.28881	10.7346	14.4222	13.8349	85	0.230826	0.322579	-2.49949	264.32	30.8	42.9451	SCPC w/o CCS
CaLC-6	[49]	€2009	CaO Looping with Combined Cycle Design 4	846	35.261	10209.6	54.3	75.7116	80.2161	44.0904	60.7422	63.4149	67.0579	1	1.34352	1.28881	10.2096	13.7168	13.1582	85	0.250147	0.337411	-1.48375	308.758	28.9	40.2958	SCPC w/o CCS
CaLC-7	[49]	€2009	CaO Looping with Combined Cycle Design 5	835.3	34.782	10350.2	54.5	75.9904	80.4022	44.1498	60.824	63.4195	67.0628	1	1.34352	1.28881	10.3502	13.9057	13.3394	85	0.251182	0.339648	-1.18144	317.466	29.2	40.7141	SCPC w/o CCS
CaLC-8	[50]	$2011	CaO Looping	932.9	33.1	10876.1	90.68	90.68	94.9315	73.822	73.822	77.8275	79.9779	1.55	1.55	1.3749	16.858	16.858	14.9535	99	0.0362807	0.129242	16.9481	149.458
CaLC-9	[47]	€2013	Sub-critical pulverized coal with CaO Looping	558.9	32.06	11228.9	73.77	97.9762	88.9206	49.0663	63.3863	63.4881	62.9431	2.2	2.55351	2.31344	24.7037	28.6733	25.9775	92.25	0.162162	0.258139	11.3722	222.199	28.21	37.4665	SCPC w/o CCS
CaLC-10	[47]	€2013	SCPC with CaO Looping	544.22	35.91	10025.1	68.41	90.8574	82.4991	46.3549	59.8835	59.8203	59.3067	2.2	2.55351	2.31344	22.0551	25.5991	23.1924	92.26	0.152628	0.238316	1.95795	168.611	31.34	41.6236	SCPC w/o CCS
CaLC-11	[47]	€2013	IGCC with CaO Looping	558.08	35.97	10008.3	76.48	101.575	93.0077	54.4617	70.3563	70.4589	69.854	2.2	2.55351	2.31344	22.0183	25.5564	23.1537	92.95	0.113408	0.198953	15.9523	184.65	31.01	41.1853	SCPC w/o CCS
CaLC-12	[94]	$2012	SCPC with CaO Looping	1060	36	10000	136.85	136.85	143.839	120.5	120.5	128.671	129.275	1.635	1.635	1.45639	16.35	16.35	14.5639	90	0.150931	0.236404	88.5954	467.806	100.701	100.701	SCPC w/o CCS
CCL-1	[95]	$2003	Chemical Looping Combustion	164.484	30.88	11658	58.4	58.4	100.891	44.6	44.6	39.5286	78.0346	1.18373	1.18373	1.96056	13.8	13.8	22.8563	90-99	0.032	0.131645	24.3308	169.926	15	15	Coal fired Power plant w/o capture
CCL-2	[95]	$2003	Chemical Looping Gasification	256.83	36.9	9756.1	52.2	52.2	93.4855	40.6	40.6	37.6231	74.273	1.189	1.189	1.96928	11.6	11.6	19.2125	90-99	0.041	0.124389	15.0843	142.585	12	12	Chemical looping Gasification w/o capture
CCL-3	[96]	$2007	Syngas Chemical Looping	346.8	34.7	10374.6	100.7	100.7	97.7156	83.4522	83.4522	79.691	77.0572	1.6625	1.6625	1.99124	17.2478	17.2478	20.6584	90	0.02762	0.116295	20.0453	152.078
CCL-4	[97]	$2011	Coal Direct Chemical Looping (CDCL) Retrofit to Pulverized Coal Power Plants for In-Situ CO2 Capture	548	35.2	10227.3	78.4	78.4	78.3073	62.5	62.5	62.4772	64.2035	1.55467	1.55467	1.37903	15.9	15.9	14.1038	97	0.028	0.115416	-3.38907	91.9356
CCL-5	[98]	$2011	Alstom Limestone Chemical Looping plant using Fast CFB transport reactors	550	35.8	10055.9	96.7	96.7	95.432	68.6783	68.6783	68.6783	70.576	2.7866	2.7866	2.4718	28.0217	28.0217	24.856	97	0.018	0.103951	17.0336	139.709	29.76	29.76	SCPC w/o CCS
NGCC-1	[6]	$2011	Solvent Based - Econamine FG+	559	45.7	7877.46	83.3	83.3	65.6852	37.5319	37.5319	37.5929	38.6316	5.81	5.81	3.4343	45.7681	45.7681	27.0536	90	0.04298	0.114766	-18.6011	52.9837	81.18	81.18	NGCC w/o CCS
NGCC-2	[99]	€2011	Solvent Based - MEA	789	46.1	7809.11	74.365	103.541	56.2717	32.0396	38.3219	39.73	40.8278	5.42	3.34575	1.97768	42.3254	26.1273	15.4439	90	0.04398	0.115143	-29.9617	24.0984	78.055	108.678	NGCC w/o CCS
NGCC-3	[99]	€2011	Solvent Based - Advanced Amine	804	47	7659.57	68.505	95.3816	49.6063	26.9901	32.2823	33.5316	34.4581	5.42	3.34575	1.97768	41.5149	25.627	15.1482	90	0.04298	0.11278	-37.8919	3.57599	59.1721	82.3871	NGCC w/o CCS
NGCC-4	[100]	$2007	Solvent Based - Econamine FG+	448.9	42.6	8450.7	81.491	81.491	48.0822	29.0121	29.0121	28.4288	27.4892	6.21	6.21	2.43684	52.4789	52.4789	20.593	90	0.04598	0.12299	-40.2184	-1.11142			NGCC w/o CCS
NGCC-5	[66]	$2013	Solvent Based - Amine	485	42.4	8490.57	104.6	104.6	87.5726	60.2792	60.2792	59.5259	59.0148	5.22	5.22	3.36346	44.3208	44.3208	28.5577	90	0.04498	0.122353	7.85372	123.078	121	121	NGCC w/o CCS
NGCC-6	[72]	£2011	Solvent Based - Amine	389	40.8	8823.53	69.3	111.148	66.1229	37.5353	53.1622	51.3525	52.7715	3.6	2.5599	1.51316	31.7647	22.5874	13.3514	94	0.03008	0.110487	-17.9808	53.6233	62.8	100.723	NGCC w/o CCS
NMEM-1	[101]	$2012	Solvent supported CO2 membrane	376.9	48	7500	63.8	63.8	57.423	35.45	35.45	34.1352	34.2954	3.78	3.78	3.08368	28.35	28.35	23.1276	90	0.04328	0.111626	-28.4526	27.343	73.5	73.5	NGCC w/o CCS
NOXY-1	[102]	$2011	Oxy-fuel	174.2	31.22	11531.1	123.7	123.7	102.072	89.1068	89.1068	79.429	81.6238	3	3	1.77331	34.5932	34.5932	20.4481	90	0.06198	0.16706	26.9587	196.269	114.64	114.64	NGCC w/o CCS
NGFC-1	[103]	$2007	SOFC base case ($1000/kW installed)	693	74	4864.86	64.5	64.5	45.2404	33.3756	33.3756	34.1559	33.027	6.3978	6.3978	2.51053	31.1244	31.1244	12.2134	100	0	0.0443325	-39.861	-8.06662
NGFC-2	[103]	$2007	SOFC ($500/kW installed half-capital)	693	74	4864.86	57.4	57.4	38.2146	26.2756	26.2756	26.8899	26.0012	6.3978	6.3978	2.51053	31.1244	31.1244	12.2134	100	0	0.0443325	-47.6672	-25.8082
NGFC-3	[103]	$2007	SOFC with 100% increase in operating	693	74	4864.86	67.3	67.3	48.0112	36.1756	36.1756	37.0214	35.7978	6.3978	6.3978	2.51053	31.1244	31.1244	12.2134	100	0	0.0443325	-36.7825	-1.06994
NGFC-4	[103]	$2007	SOFC with 25% increase in capital cost	693	74	4864.86	70.4	70.4	51.0788	39.2756	39.2756	40.1938	38.8654	6.3978	6.3978	2.51053	31.1244	31.1244	12.2134	100	0	0.0443325	-33.3741	6.67637
NGFC-5	[103]	$2007	SOFC with 50% increase in capital cost	693	74	4864.86	76.3	76.3	56.9172	45.1756	45.1756	46.2318	44.7038	6.3978	6.3978	2.51053	31.1244	31.1244	12.2134	100	0	0.0443325	-26.8873	21.4194
NGFC-6	[104]	$2007	Low pressure autothermal reforming (ATR)-six parallel SOFC sections.	550	56.3	6394.32	77.9	77.9	52.511	38.1913	38.1913	38.1913	36.9291	6.21	6.21	2.43684	39.7087	39.7087	15.5819		0.0003	0.0585701	-32.2938	10.6767	47.17	47.17	PC w/o CCS
NGFC-7	[104]	$2007	Low pressure ATR-eight parallel SOFC sections. ASU oxidant capacity is 58% smaller than the previous case	550	61.8	5825.24	62.6	62.6	39.747	26.4252	26.4252	26.4252	25.5519	6.21	6.21	2.43684	36.1748	36.1748	14.1952		0.0003	0.0533843	-46.4315	-22.4516	9.14918	9.14918	PC w/o CCS
NGFC-8	[104]	$2007	High pressure ATR	550	64.8	5555.56	67.8	67.8	45.7374	33.3	33.3	33.3	32.1994	6.21	6.21	2.43684	34.5	34.5	13.538		0.0044	0.0550267	-39.7815	-7.00071	22.2667	22.2667	PC w/o CCS
NGFC-9	[104]	$2007	High pressure ATR- ASU oxidant capacity is 58% smaller than the previous case	550	64.8	5555.56	65.3	65.3	43.32	30.8	30.8	30.8	29.7821	6.21	6.21	2.43684	34.5	34.5	13.538		0.0044	0.0550267	-42.4997	-13.2744	15.9835	15.9835	PC w/o CCS
NGFC-10	[104]	$2007	No ATR	550	65.9	5462.82	61.2	61.2	39.6864	27.2759	27.2759	27.2759	26.3744	6.21	6.21	2.43684	33.9241	33.9241	13.312		0.0003	0.0500816	-46.3278	-22.417	5.62179	5.62179	PC w/o CCS
NCLC-1	[105]	$2002	NG Chemical Looping Combustion	340.66	46.94	7669.37	41.2	41.2	56.7034	20.301	20.301	19.3514	40.3246	2.725	2.725	2.1356	20.899	20.899	16.3787	98	0.0076	0.0774894	-28.1624	22.7873	18.55	18.55	NGCC w/o CCS
* Unfortunately, the reference was erroneously ommitted in the original paper. The missing reference is:
Haslbeck, J.L.; Zhang C.; Brasington R.D.; Woods M.C.; Lewis E.G.; Black J.; Kyle A.; Turner M. Cost and Performance for Low-Rank Pulverized Coal Oxycombustion Energy Plants; DOE. NETL-401/093010; National Technology Laboratory: Pittsburg, PA, USA, 2010.

## Sheet: Uniform Fuel Prices
Supplementary Material for "CO2 Capture Approaches for Fossil-Based Power Generation: Review and Meta-Study" in the journal Processes
by Adams TA II, Hoseinzade L, Madabhushi PB, Okeke IJ (2017)				Please cite original paper when referring to this material
McMaster University				VERSION 2, UPDATED DECEMBER 20, 2017
USES "UNIFORM" FUEL PRICES				Capacity	Efficiency	Heat Rate	LCOE			Non-Fuel Costs				Fuel Unit Prices			Fuel Costs			Greenhouse Gas Emissions			Calculated CCA		As Reported CCA (Nonstandard Reference )
Tag	Ref	As-Reported Project Year and Local Currency Unit (LCU)	Plant Type	As-Reported Plant Capacity (Net Output) in MW	As-Reported Electrical Efficiency (%HHV)	Heat Rate (MJ/MWh)	As-Reported LCOE in Project Year (LCU/MWh)	As-Reported LCOE converted to $US for same project year ($US/MWh)	Calculated LCOE at Standard Conditions ($US2016/MWh)	As-Reported Non-Fuel Cost in Project Year (LCU/MWh)	Non-Fuel Cost Localized to North America using PPP at As-Reported Capacity in Project Year ($US/MWh)	Non-Fuel Cost Localized to North America using PPP at Standard Capacity in Project Year ($US/MWh)	Non-Fuel Cost Localized to North America at Standard Capacity in 2016 ($US2016/MWh)	As-Reported Fuel Unit Price in Project Year (LCU/GJ)	As-Reported Fuel Unit Price Localized to North America in Project Year ($US/GJ)	Fuel Unit Prices Using US Average 2016 Price ($US2016/GJ)	As-Reported Fuel Cost in Project Year (LCU/MWh)	As-Reported Fuel Cost Localized to North America in Project Year ($/MWh)	Fuel Cost Localized to North America in 2016 ($US2016/MWh)	Percentage of CO2 Removed	Direct Greenhouse Gas Emissions (tCO2e/MWh)	Total Cradle-To-Gate Exit Greenhouse Gas Emissions (tCO2e/MWh)	CCA vs SCPC w/o CO2 Capture ($US2016/tCO2e)	CCA vs NGCC w/o CO2 Capture ($US2016/tCO2e)	As-Reported CCA in Project Year (LCU/tCO2e)	As-Reported CCA in US Currency and Project Year ($/tCO2e)	As-Reported Reference Plant for CCA Calculation
SCPC-1	[6]	$2011	Solvent Based - EconFG+	550	32.5	11076.9	133.2	133.2	127.492	102.406	102.406	102.406	105.236	2.78	2.78	2.00929	30.7938	30.7938	22.2567	90	0.191764	0.286442	76.6273	548.228	75.2198	75.2198	SCPC w/o CCS
SCPC-2	[66]	$2013	Solvent Based	525	27.4	13138.7	129.5	129.5	123.982	98.8869	98.8869	98.4279	97.5829	2.33	2.33	2.00929	30.6131	30.6131	26.3994	90	0.214764	0.327065	75.9836	713.839	70	70	SCPC w/o CCS
SCPC-3	[66,67]	€2010	Solvent Based - Adv.amine	837	36.1	9972.3	68.7	91.178	81.6809	43.5698	56.4597	58.8809	61.6437	2.52	2.58978	2.00929	25.1302	25.826	20.0372	90	0.189764	0.275	6.87728	233.221	29.8	39.5503	SCPC w/o CCS
SCPC-4	[68]	€2013	Solvent Based - Cansolv	822	33.8	10650.9	86.3	114.618	100.146	60.8444	76.2992	79.4275	78.7456	2.39	2.77404	2.00929	25.4556	29.546	21.4007	90	0.187764	0.278801	34.6604	353.014	52.53	69.7667	SCPC w/o CCS
SCPC-5	[69]	$2010	Solvent Based - Amine	546	27.2	13235.3	122	122	118.086	87.4559	87.4559	87.3921	91.4926	2.61	2.61	2.00929	34.5441	34.5441	26.5935	90	0.210164	0.32329	66.0283	640.45	78	78	SCPC w/o CCS
SCPC-6	[66,70]	€2010	Solvent Based - Adv.Amine	616	36.5	9863.01	70.3	93.3015	82.5609	47.6151	59.2558	59.9312	62.7432	2.3	2.36368	2.00929	22.6849	23.313	19.8176	90	0.186764	0.271066	8.14402	232.999	33.3	44.1954	SCPC w/o CCS
SCPC-7	[71]	$2006	Solvent based-Chilled Ammonia	548.7	28.4	12676.1	80.8	80.8	105.237	64.1944	64.1944	64.1792	79.7668	1.31	1.31	2.00929	16.6056	16.6056	25.4699	90	0.205364	0.31371	44.6506	490.529	36.97	36.97	SCPC w/o CCS
SCPC-8	[71]	$2006	Solvent based-Chilled Ammonia	549.3	31.5	11428.6	74.7	74.7	97.1891	59.7286	59.7286	59.721	74.2258	1.31	1.31	2.00929	14.9714	14.9714	22.9633	90	0.194464	0.292148	30.8357	364.853	28.98	28.98	SCPC w/o CCS
SCPC-9	[15,76]	$2007	Solvent based-Chilled Ammonia	558.7	27.9	12903.2	100.7	100.7	102.676	79.2483	79.2483	79.3727	76.7495	1.66251	1.66251	2.00929	21.4517	21.4517	25.9263	90	0.214764	0.325052	41.3332	516.572	69.45	69.45	SCPC w/o CCS
SCPC-10	[12]	€2008	Solvent based-Chilled Ammonia	614	36.6	9836.07	82.3	121.042	88.3326	52.8	67.3732	68.119	68.5691	2.99917	3.54813	2.00929	29.5	34.8997	19.7635	88.4	0.191864	0.275936	16.8381	275.007	38.6	56.7706	U-SCPC w/o CCS
SCPC-11	[72]	£2011	Solvent Based-Amine	519	25.6	14062.5	102	163.595	135.766	74.2969	105.229	104.62	107.511	1.97	2.27193	2.00929	27.7031	31.949	28.2556	94	0.170764	0.290961	89.8198	620.198	59	94.6283	SCPC w/o CCS
IGCC-1	[73]	$2011	Solvent Based-Selexol	543	32.6	11042.9	135.4	135.4	129.644	104.701	104.701	104.567	107.456	2.78	2.78	2.00929	30.6994	30.6994	22.1885	90	0.14664	0.241028	74.739	434.109	78.3372	78.3372	IGCC w/o CCS
IGCC-2	[73]	$2011	Solvent Based-Selexol	513	31	11612.9	141.9	141.9	135.197	109.616	109.616	108.855	111.863	2.78	2.78	2.00929	32.2839	32.2839	23.3337	90	0.15164	0.250899	83.8098	486.04	88.6	88.6	IGCC w/o CCS
IGCC-3	[73]	$2011	Solvent Based-Selexol	497	31.2	11538.5	152.6	152.6	145.789	120.523	120.523	119.308	122.605	2.78	2.78	2.00929	32.0769	32.0769	23.1841	90	0.15264	0.251263	99.1355	542.992	103	103	IGCC w/o CCS
IGCC-4	[66]	$2013	Data not available	500	29.9	12040.1	130	130	124.305	101.946	101.946	100.979	100.113	2.33	2.33	2.00929	28.0535	28.0535	24.1921	86	0.20364	0.306551	74.0451	606.799	45	45	IGCC w/o CCS
IGCC-5	[69]	$2010	Solvent Based-Selexol NS	694	32	11250	113	113	112.227	83.6375	83.6375	85.6053	89.622	2.61	2.61	2.00929	29.3625	29.3625	22.6045	90	0.14464	0.240797	49.9582	346.321	57.153	57.153	IGCC w/o CCS
IGCC-6	[72]	£2011	Solvent Based - Shift + Selexol	455	35.1	10256.4	79.7	127.828	105.574	59.4949	84.2642	82.6814	84.966	1.97	2.27193	2.00929	20.2051	23.3018	20.6081	94	0.10964	0.197305	38.1448	256.974	25.4	40.7383	IGCC w/o CCS
CMEM-1	[74,76]	$2010	Membrane - 2 stage	550	25.7	14007.8	112	112	112.111	80.2023	80.2023	80.2023	83.9655	2.27	2.27	2.00929	31.7977	31.7977	28.1457	90	0.216764	0.336493	57.6332	664.337	78	78	SCPC w/o CCS
CMEM-2	[75]	€2008	Membrane - 3 stage	754.3	33	10909.1	94	138.25	125.316	81.6494	99.5238	102.718	103.396	1.13213	1.66508	2.00929	12.3506	18.1645	21.9195	90	0.199464	0.292708	74.0241	556.751	53	77.9492	SCPC/ MEA CCS
CMEM-3	[74,76]	$2010	Membrane- Two stage two step with air sweep	550	25.7	14007.8	94.1	94.1	88.0186	57.1895	57.1895	57.1895	59.873	2.635	2.635	2.00929	36.9105	36.9105	28.1457	90	0.218864	0.338593	18.0614	441.268	30.7	30.7	SCPC w/o CCS
CMEM-4	[77,78]	$2007	H2-CO2 selective membrane with sweep gas	556	31	11612.9	90.48	90.48	91.6957	70.6219	70.6219	70.6986	68.362	1.71	1.71	2.00929	19.8581	19.8581	23.3337	90	0.145973	0.245233	20.909	248.967
CMEM-5	[77,78,79]	$2007	2 stages membrane with argon as sweep gas (Amine-containing - membranes synthesized and tested)	550	31	11612.9	100	100	100.827	80.1419	80.1419	80.1419	77.4932	1.71	1.71	2.00929	19.8581	19.8581	23.3337	90	0.145973	0.245233	33.9697	295.768
CMEM-6	[80]	€2015	Cascade Membrane system- polymeric	439.1	34.782	10350.2	85.9	95.3542	87.0374	53.0485	68.6371	67.1088	66.2408	3.174	3.33338	2.00929	32.8515	34.5011	20.7965	90	0.220064	0.30853	15.6642	333.184	44.7	49.6197	SCPC w/o CCS
CMEM-7	[80]	€2015	3 end membrane integration- ceramic	491.6	38.9021	9253.99	77.3	85.8076	79.1204	47.9278	62.0118	61.3195	60.5265	3.174	3.33338	2.00929	29.3722	30.8471	18.5939	90	0.178164	0.257261	2.97323	196.638	31.5	34.9669	SCPC w/o CCS
CMEM-8	[80]	€2015	Microporous ceramic membrane - H2 selective	295.3	36.5067	9861.21	84.1	93.356	83.1807	52.8005	68.3163	64.197	63.3667	3.174	3.33338	2.00929	31.2995	32.8711	19.814	90	0.14964	0.233927	8.59075	194.08	36.6	40.6282	IGCC w/o CCS
CMEM-9	[80]	€2015	Microporous ceramic membrane - soar WGS membrane	316	38.9021	9253.99	80.6	89.4708	80.4912	51.2278	66.2815	62.7082	61.8972	3.174	3.33338	2.00929	29.3722	30.8471	18.5939	90	0.13824	0.217337	4.69535	167.581	30.5	33.8568	IGCC w/o CCS
CMEM-10	[81]	€2015	Integrated WGS membrane reactor	219.4	32	11250	86	95.4652	101.287	63.5012	87.3866	79.7136	78.6826	1.99989	2.22	2.00929	22.4988	24.975	22.6045	81	0.23464	0.330797	39.457	530.988	47.1	52.2838	IGCC w/o CCS
CMEM-11	[82]	€2015	Two stages membrane	350	24.9	14457.8	110	122.107	120.969	75.3012	97.429	93.1234	91.919	2.4	2.52051	2.00929	34.6988	36.4411	29.05	90	0.227764	0.35134	74.0125	874.676
CMEM-12	[83]	€2014	Membrane- cryogenic	427.409	33.82	10644.6	65.5	87.0187	82.5075	49.5331	64.6157	63.0066	61.1195	1.5	2.37	2.00929	15.9669	25.2277	21.388	90	0.193065	0.284048	8.22335	252.01	48.24	64.0883	SCPC w/o CCS
CCRY-1	[16]	€2012	Cryogenic	699	33.0572	10890.2	99.7	138.815	115.001	74.4347	88.4694	90.6159	93.1198	2.32	3.23021	2.00929	25.2653	35.1776	21.8816	90	0.192764	0.192764	50.4573	290.339	34.5	48.0354	SCPC w/o CCS
COXY-1	[84]	€2015	Oxy-fuel	376.06	34.31	10492.6	70.06	77.7708	48.5362	46.9764	28.891	27.8133	27.4536	2.2	2.31047	2.00929	23.0836	24.2428	21.0826	91	0.07069	0.160373	-36.405	19.3477	33.9	37.631	SCPC w/o CCS
COXY-2	[84]	€2015	Oxy-fuel	352.9	32.2	11180.1	88.54	98.2847	59.5968	63.9437	39.3262	37.6193	37.1328	2.2	2.31047	2.00929	24.5963	25.8313	22.4641	90	0.08262	0.17818	-22.8151	62.8518	60.21	66.8367	SCPC w/o CCS
COXY-3	[85]	€2012	Oxy-fuel	670.28	34.72	10368.7	71.7	92.194	93.4738	55.8039	70.885	72.3009	72.6402	1.53309	1.53565	2.00929	15.8961	15.9226	20.8336	94	0.04769	0.136314	20.2912	165.624	33.7	43.3325	SCPC w/o CCS
COXY-4	[85]	€2012	Oxy fuel with 10% air added	669.27	34.67	10383.6	71.4	91.8083	93.0726	55.481	70.4748	71.8717	72.2089	1.53309	1.53565	2.00929	15.919	15.9456	20.8637	94	0.04776	0.136512	19.7995	164.411	33.3	42.8181	SCPC w/o CCS
COXY-5	[85]	€2012	Oxy fuel with 20% air added	666.23	34.51	10431.8	71.3	91.6797	92.9104	55.3072	70.254	71.6139	71.95	1.53309	1.53565	2.00929	15.9928	16.0195	20.9604	94	0.04798	0.137144	19.614	164.218	33.2	42.6896	SCPC w/o CCS
COXY-6	[85]	€2012	Oxy fuel with 30% air added	661.18	34.25	10510.9	71.4	91.8083	92.9869	55.2858	70.2268	71.5317	71.8674	1.53309	1.53565	2.00929	16.1142	16.1411	21.1195	94	0.04835	0.13819	19.7345	165.041	33.4	42.9467	SCPC w/o CCS
COXY-7	[85]	€2012	Oxy fuel with 40% air added	654.12	33.88	10625.7	71.7	92.194	93.3015	55.4098	70.3844	71.6153	71.9513	1.53309	1.53565	2.00929	16.2902	16.3174	21.3502	94	0.04887	0.139692	20.1622	166.911	33.8	43.4611	SCPC w/o CCS
COXY-8	[85]	€2012	Oxy fuel with 50% air added	645.05	33.41	10775.2	72.5	93.2227	94.2417	55.9806	71.1095	72.2521	72.5912	1.53309	1.53565	2.00929	16.5194	16.547	21.6505	94	0.04956	0.141659	21.3829	171.158	34.9	44.8755	SCPC w/o CCS
COXY-9	[86]	€2007	Oxy-fuel	238.53	32.29	11149	57.5	78.8187	78.3387	45.2361	62.8896	57.8492	55.9372	1.1	0.868921	2.00929	12.2639	9.68757	22.4015	90	0.1357	0.230994	1.76799	168.232	22	30.1567	SCPC w/o CCS
COXY-10	[87]	$2009	Oxy-fuel	533.2	32.74	10995.7	82.3	82.3	86.6387	61.2282	61.2282	61.0386	64.5451	1.91636	1.91636	2.00929	21.0718	21.0718	22.0936	93	0.0528	0.146784	11.9878	148.247	37.9	37.9	SCPC w/o CCS
COXY-11	[88]	€2014	Oxy-fuel with compression and dehydration	310	33.81	10647.7	116.3	154.508	138.097	97.6665	127.405	120.306	116.703	1.75	2.12808	2.00929	18.6335	22.6592	21.3944	100	0	0.0910096	71.5054	271.882	70.97	94.2858	OXY-Fuel w/o CCS
COXY-12	[88]	€2014	Oxy-fuel with double flash purification	270.6	29.51	12199.3	133.5	177.359	156.713	112.151	146.301	136.284	132.202	1.75	2.12808	2.00929	21.3487	25.961	24.5118	92	0.0845	0.188771	105.395	451.536	103.52	137.529	OXY-Fuel w/o CCS
COXY-13	[88]	€2014	Oxy-fuel with distillation purification	265.8	28.99	12418.1	139.8	185.728	163.879	118.068	154.02	143.217	138.928	1.75	2.12808	2.00929	21.7316	26.4266	24.9515	90	0.1075	0.213641	118.788	532.68	116.1	154.242	OXY-Fuel w/o CCS
COXY-14	[89]	€2009	Oxy-fuel	574	36.6	9836.07	67.2	93.6983	83.2673	51.5402	59.7978	60.0538	63.5038	1.59208	2.13899	2.00929	15.6598	21.0392	19.7635	90	0.119	0.203072	8.34995	169.206	46.2	64.4176	SCPC w/o CCS
COXY-15	[68]	$2007	Oxy-fuel (Case: S12F)	550	31	11612.9	96	96	108.072	87.6349	87.6349	87.6349	84.7386	0.720328	0.720328	2.00929	8.3651	8.3651	23.3337	90.8	0.0975225	0.196782	41.4598	266.679	48.72	48.72	SCPC w/o CCS
COXY-16	*	$2007	Oxy-fuel (Case: S22F)	549	30.1	11960.1	106.9	106.9	119.051	98.2848	98.2848	98.2669	95.0192	0.720328	0.720328	2.00929	8.61522	8.61522	24.0314	90.9	0.09888	0.201107	56.4715	317.389	63.16	63.16	SCPC w/o CCS
COXY-17	*	$2013	Oxy-fuel (Boiler type & Coal rank: USC-subbit)	509	31.5	11428.6	119.8	119.8	120.918	99.5714	99.5714	98.803	97.9548	1.77	1.77	2.00929	20.2286	20.2286	22.9633	90	0.105	0.202684	59.1096	327.353	73	73	SCPC w/o CCS
COXY-18	[66]	$2013	Oxy-fuel (Boiler type & Coal rank: SCPC-bit)	501	31	11612.9	121.4	121.4	122.384	100.845	100.845	99.9085	99.0508	1.77	1.77	2.00929	20.5548	20.5548	23.3337	98	0.021	0.120259	54.977	247.638	67	67	SCPC w/o CCS
COXY-19	[66]	$2013	Oxy-fuel (Boiler type & Coal rank: SCPC-bit)	510	31.5	11428.6	118.7	118.7	119.855	98.4714	98.4714	97.7307	96.8917	1.77	1.77	2.00929	20.2286	20.2286	22.9633	90	0.105	0.202684	57.6762	322.88	71	71	SCPC w/o CCS
COXY-20	[68]	€2013	Oxy-fuel (Boiler type & Coal rank: USC-subbit)	833	34.1	10557.2	83.37	110.726	98.8297	58.1383	75.106	78.2893	77.6172	2.39	2.77404	2.00929	25.2317	29.2861	21.2124	90	0.092	0.182236	28.5412	215.841	48.2159	64.037	SCPC w/o CCS
COXY-21	[90]	$2007	Oxy-combustion Supercritical PC with CO2 Capture	550	29.3	12286.7	100.7	100.7	101.79	79.738	79.738	79.738	77.1027	1.70607	1.70607	2.00929	20.962	20.962	24.6875	99.5	0	0.105018	29.4427	174.967	42.6	42.6	SCPC w/o CCS
COXY-22	[90]	$2007	Oxy-combustion Supercritical PC with CO2 Capture	555.1	29.5	12203.4	99.8	99.8	100.96	78.9802	78.9802	79.0531	76.4404	1.70607	1.70607	2.00929	20.8198	20.8198	24.5201	99.4	0	0.104306	28.4301	172.127	41.5	41.5	SCPC w/o CCS
COXY-23	[90]	$2007	Oxy-combustion Supercritical PC with CO2 Capture	549	29.3	12286.7	101.8	101.8	102.84	80.838	80.838	80.8233	78.1521	1.70607	1.70607	2.00929	20.962	20.962	24.6875	96.9	0.026762	0.13178	31.7038	193.543	45.3	45.3	SCPC w/o CCS
COXY-24	[90]	$2007	Oxy-combustion Supercritical PC with CO2 Capture	548.7	29.2	12328.8	102.6	102.6	103.624	81.5663	81.5663	81.547	78.8518	1.70607	1.70607	2.00929	21.0337	21.0337	24.772	85.5	0.0762036	0.181582	34.8019	233.823	49.4	49.4	SCPC w/o CCS
COXY-25	[90]	$2007	Oxy-combustion Ultra-supercritical PC with CO2 Capture	550	33	10909.1	95.9	95.9	96.6534	77.2883	77.2883	77.2883	74.7339	1.70607	1.70607	2.00929	18.6117	18.6117	21.9195	99.4	0	0.0932435	23.0001	154.232	37.1	37.1	SCPC w/o CCS
COXY-26	[90]	$2007	Oxy-combustion Ultra-supercritical PC with CO2 Capture	545.3	32.7	11009.2	98.6	98.6	99.234	79.8176	79.8176	79.7491	77.1134	1.70607	1.70607	2.00929	18.7824	18.7824	22.1206	93.2	0.0598743	0.153973	28.0322	195.951	43.4	43.4	SCPC w/o CCS
IGFC-1	[44]	$2011	Uses WGS to minimize CO content in SOFC feed	719	42	8571.43	78	78	84.623	63.8542	63.8542	65.5882	67.4005	1.65035	1.65035	2.00929	14.1458	14.1458	17.2225	100	0	0.0732628	8.66197	113.064
IGFC-2	[44]	$2011	IGFC-1 but with seasonal SOFC shutdowns to preserve life during low-demand deasons	719	42	8571.43	78.8	78.8	85.4674	64.6542	64.6542	66.41	68.2449	1.65035	1.65035	2.00929	14.1458	14.1458	17.2225	100	0	0.0732628	9.63135	115.364
IGFC-3	[44]	$2011	IGFC-1 with integrated energy storage	719	41.5	8674.7	81.5	81.5	88.345	67.1837	67.1837	69.0082	70.915	1.65035	1.65035	2.00929	14.3163	14.3163	17.43	100	0	0.0741454	12.9478	123.5
IGFC-4	[44]	$2011	IGFC-2 with integrated energy storage	719	40.6	8867	82.4	82.4	89.3463	67.7664	67.7664	69.6067	71.53	1.65035	1.65035	2.00929	14.6336	14.6336	17.8163	100	0	0.0757891	14.1252	126.804
IGFC-5	[44]	$2011	Uses coal syngas directly in SOFC with no WGS	719	38.4	9375	80.8	80.8	87.7933	65.328	65.328	67.1021	68.9562	1.65035	1.65035	2.00929	15.472	15.472	18.8371	100	0	0.0801311	12.3991	124.021
IGFC-6	[44]	$2011	IGFC-5 with seasonal SOFC shutdowns	719	38.41	9372.56	81.4	81.4	88.4259	65.932	65.932	67.7225	69.5938	1.65035	1.65035	2.00929	15.468	15.468	18.8322	100	0	0.0801103	13.1309	125.77
IGFC-7	[44]	$2011	IGFC-5 with integrated energy storage	719	38	9473.68	84.3	84.3	91.514	68.6651	68.6651	70.5298	72.4787	1.65035	1.65035	2.00929	15.6349	15.6349	19.0354	100	0	0.0809746	16.7207	134.666
IGFC-8	[44]	$2011	IGFC-5 with integrated energy storage	719	37.4	9625.67	83.6	83.6	90.8158	67.7143	67.7143	69.5532	71.475	1.65035	1.65035	2.00929	15.8857	15.8857	19.3407	100	0	0.0822737	15.936	133.204
IGFC-9	[91]	$2007	Atm-Pressure IGFC Plant	253	49.4	7287.45	88	88	82.253	75.5673	75.5673	69.9213	67.6104	1.70604	1.70604	2.00929	12.4327	12.4327	14.6426	99	0.00136078	0.063649	5.87649	103.887
IGFC-10	[91]	$2007	Pressurized IGFC	253	56.2	6405.69	79	79	73.7749	68.0716	68.0716	62.9857	60.904	1.70604	1.70604	2.00929	10.9284	10.9284	12.8709	99	0.00136078	0.0561123	-3.71808	79.784
IGFC-11	[92]	$2007	Partially methanated Syngas IGFC (TREMP)	846.6	44.3638	8114.73	96.3	96.3	96.8138	79.7459	79.7459	83.2607	80.5089	2.04	2.04	2.00929	16.5541	16.5541	16.3048	99	0.00272147	0.0720807	22.6259	145.804
IGFC-12	[92]	$2007	Partially methanated Syngas IGFC (HICOM)	925	48.4839	7425.14	84.8	84.8	85.8639	69.6527	69.6527	73.3696	70.9447	2.04	2.04	2.00929	15.1473	15.1473	14.9192	99	0.00630486	0.0697699	10.0463	115.347
IGFC-13	[92]	$2007	IGFC-DIRECT	865	45.3219	7943.17	90.6	90.6	91.2295	74.3959	74.3959	77.8421	75.2694	2.04	2.04	2.00929	16.2041	16.2041	15.9601	99	0.00674219	0.0746351	16.2717	131.553
IGFC-14	[93]	$2006	Liquid-tin anode SOFC	93.9	57.2	6293.71	71	71	77.2731	62.0522	62.0522	51.9981	64.6273	1.4217	1.4217	2.00929	8.94776	8.94776	12.6459	100	0	0.0537943	0.219691	88.3555
CaLC-1	[48]	€2005	CaO Looping	621	25.5834	14071.6	48.3	60.1113	91.0236	27.1926	37.4625	37.9201	62.7497	1.5	2.16232	2.00929	21.1074	30.4273	28.2739	85	0.187236	0.307511	21.8984	360.635	15.7	19.5393	SCPC w/o CCS
CaLC-2	[49]	€2009	CaO Looping w/o heat recovery	446	18.5887	19366.6	102	142.221	156.798	82.6334	113.842	111.48	117.885	1	1.34352	2.00929	19.3666	26.0194	38.9131	85	0.310428	0.475961	170.195	-3191.7	100.5	140.129	SCPC w/o CCS
CaLC-3	[49]	€2009	CaO Looping with Combined Cycle Design 1	594.8	24.242	14850.3	59.5	82.962	95.3963	44.6497	61.5127	61.9963	65.5578	1	1.34352	2.00929	14.8503	19.9517	29.8385	85	0.282675	0.409605	34.2561	1700.68	36.8	51.311	SCPC w/o CCS
CaLC-4	[49]	€2009	CaO Looping with Combined Cycle Design 2	446	32.674	11018	71	98.9967	107.709	59.982	82.6356	80.9216	85.5704	1	1.34352	2.00929	11.018	14.8029	22.1382	85	0.231564	0.325738	49.5146	563.579	53.9	75.1538	SCPC w/o CCS
CaLC-5	[49]	€2009	CaO Looping with Combined Cycle Design 3	594.8	33.5363	10734.6	55.5	77.3848	87.2966	44.7654	61.672	62.1568	65.7277	1	1.34352	2.00929	10.7346	14.4222	21.569	85	0.230826	0.322579	16.4351	375.13	30.8	42.9451	SCPC w/o CCS
CaLC-6	[49]	€2009	CaO Looping with Combined Cycle Design 4	846	35.261	10209.6	54.3	75.7116	87.5719	44.0904	60.7422	63.4149	67.0579	1	1.34352	2.00929	10.2096	13.7168	20.514	85	0.250147	0.337411	17.2903	431.862	28.9	40.2958	SCPC w/o CCS
CaLC-7	[49]	€2009	CaO Looping with Combined Cycle Design 5	835.3	34.782	10350.2	54.5	75.9904	87.8594	44.1498	60.824	63.4195	67.0628	1	1.34352	2.00929	10.3502	13.9057	20.7965	85	0.251182	0.339648	17.8296	444.311	29.2	40.7141	SCPC w/o CCS
CaLC-8	[50]	$2011	CaO Looping	932.9	33.1	10876.1	90.68	90.68	101.831	73.822	73.822	77.8275	79.9779	1.55	1.55	2.00929	16.858	16.858	21.8533	99	0.0362807	0.129242	30.3681	188.723
CaLC-9	[47]	€2013	Sub-critical pulverized coal with CaO Looping	558.9	32.06	11228.9	73.77	97.9762	85.5053	49.0663	63.3863	63.4881	62.9431	2.2	2.55351	2.00929	24.7037	28.6733	22.5622	92.25	0.162162	0.258139	12.2813	232.628	28.21	37.4665	SCPC w/o CCS
CaLC-10	[47]	€2013	SCPC with CaO Looping	544.22	35.91	10025.1	68.41	90.8574	79.45	46.3549	59.8835	59.8203	59.3067	2.2	2.55351	2.00929	22.0551	25.5991	20.1432	92.26	0.152628	0.238316	3.36019	179.829	31.34	41.6236	SCPC w/o CCS
CaLC-11	[47]	€2013	IGCC with CaO Looping	558.08	35.97	10008.3	76.48	101.575	89.9637	54.4617	70.3563	70.4589	69.854	2.2	2.55351	2.00929	22.0183	25.5564	20.1096	92.95	0.113408	0.198953	17.2873	194.06	31.01	41.1853	SCPC w/o CCS
CaLC-12	[94]	$2012	SCPC with CaO Looping	1060	36	10000	136.85	136.85	149.368	120.5	120.5	128.671	129.275	1.635	1.635	2.00929	16.35	16.35	20.0929	90	0.150931	0.236404	102.111	520.982	100.701	100.701	SCPC w/o CCS
CCL-1	[95]	$2003	Chemical Looping Combustion	164.484	30.88	11658	58.4	58.4	101.459	44.6	44.6	39.5286	78.0346	1.18373	1.18373	2.00929	13.8	13.8	23.4243	90-99	0.032	0.131645	29.9998	188.986	15	15	Coal fired Power plant w/o capture
CCL-2	[95]	$2003	Chemical Looping Gasification	256.83	36.9	9756.1	52.2	52.2	93.8758	40.6	40.6	37.6231	74.273	1.189	1.189	2.00929	11.6	11.6	19.6028	90-99	0.041	0.124389	20.4863	160.644	12	12	Chemical looping Gasification w/o capture
CCL-3	[96]	$2007	Syngas Chemical Looping	346.8	34.7	10374.6	100.7	100.7	97.9028	83.4522	83.4522	79.691	77.0572	1.6625	1.6625	2.00929	17.2478	17.2478	20.8456	90	0.02762	0.116295	25.1492	169.06
CCL-4	[97]	$2011	Coal Direct Chemical Looping (CDCL) Retrofit to Pulverized Coal Power Plants for In-Situ CO2 Capture	548	35.2	10227.3	78.4	78.4	84.7531	62.5	62.5	62.4772	64.2035	1.55467	1.55467	2.00929	15.9	15.9	20.5495	97	0.028	0.115416	9.25941	128.132
CCL-5	[98]	$2011	Alstom Limestone Chemical Looping plant using Fast CFB transport reactors	550	35.8	10055.9	96.7	96.7	90.7811	68.6783	68.6783	68.6783	70.576	2.7866	2.7866	2.00929	28.0217	28.0217	20.2051	97	0.018	0.103951	16.3058	141.685	29.76	29.76	SCPC w/o CCS
NGCC-1	[6]	$2011	Solvent Based - Econamine FG+	559	45.7	7877.46	83.3	83.3	59.462	37.5319	37.5319	37.5929	38.6316	5.81	5.81	2.6443	45.7681	45.7681	20.8304	90	0.04298	0.114766	-21.2337	50.1957	81.18	81.18	NGCC w/o CCS
NGCC-2	[99]	€2011	Solvent Based - MEA	789	46.1	7809.11	74.365	103.541	61.4774	32.0396	38.3219	39.73	40.8278	5.42	3.34575	2.6443	42.3254	26.1273	20.6496	90	0.04398	0.115143	-18.8129	56.4514	78.055	108.678	NGCC w/o CCS
NGCC-3	[99]	€2011	Solvent Based - Advanced Amine	804	47	7659.57	68.505	95.3816	54.7123	26.9901	32.2823	33.5316	34.4581	5.42	3.34575	2.6443	41.5149	25.627	20.2542	90	0.04298	0.11278	-26.8946	35.3913	59.1721	82.3871	NGCC w/o CCS
NGCC-4	[100]	$2007	Solvent Based - Econamine FG+	448.9	42.6	8450.7	81.491	81.491	49.8354	29.0121	29.0121	28.4288	27.4892	6.21	6.21	2.6443	52.4789	52.4789	22.3462	90	0.04598	0.12299	-33.1664	21.1625			NGCC w/o CCS
NGCC-5	[66]	$2013	Solvent Based - Amine	485	42.4	8490.57	104.6	104.6	81.4664	60.2792	60.2792	59.5259	59.0148	5.22	5.22	2.6443	44.3208	44.3208	22.4516	90	0.04498	0.122353	5.33925	120.592	121	121	NGCC w/o CCS
NGCC-6	[72]	£2011	Solvent Based - Amine	389	40.8	8823.53	69.3	111.148	76.1035	37.5353	53.1622	51.3525	52.7715	3.6	2.5599	2.6443	31.7647	22.5874	23.3321	94	0.03008	0.110487	-1.16802	99.9953	62.8	100.723	NGCC w/o CCS
NMEM-1	[101]	$2012	Solvent supported CO2 membrane	376.9	48	7500	63.8	63.8	54.1276	35.45	35.45	34.1352	34.2954	3.78	3.78	2.6443	28.35	28.35	19.8322	90	0.04328	0.111626	-27.5594	33.4885	73.5	73.5	NGCC w/o CCS
NOXY-1	[102]	$2011	Oxy-fuel	174.2	31.22	11531.1	123.7	123.7	112.115	89.1068	89.1068	79.429	81.6238	3	3	2.6443	34.5932	34.5932	30.4916	90	0.06198	0.16706	45.076	252.47	114.64	114.64	NGCC w/o CCS
NGFC-1	[103]	$2007	SOFC base case ($1000/kW installed)	693	74	4864.86	64.5	64.5	45.8912	33.3756	33.3756	34.1559	33.027	6.3978	6.3978	2.6443	31.1244	31.1244	12.8642	100	0	0.0443325	-34.6501	6.99932
NGFC-2	[103]	$2007	SOFC ($500/kW installed half-capital)	693	74	4864.86	57.4	57.4	38.8653	26.2756	26.2756	26.8899	26.0012	6.3978	6.3978	2.6443	31.1244	31.1244	12.8642	100	0	0.0443325	-42.4563	-10.7423
NGFC-3	[103]	$2007	SOFC with 100% increase in operating	693	74	4864.86	67.3	67.3	48.662	36.1756	36.1756	37.0214	35.7978	6.3978	6.3978	2.6443	31.1244	31.1244	12.8642	100	0	0.0443325	-31.5716	13.996
NGFC-4	[103]	$2007	SOFC with 25% increase in capital cost	693	74	4864.86	70.4	70.4	51.7296	39.2756	39.2756	40.1938	38.8654	6.3978	6.3978	2.6443	31.1244	31.1244	12.8642	100	0	0.0443325	-28.1633	21.7423
NGFC-5	[103]	$2007	SOFC with 50% increase in capital cost	693	74	4864.86	76.3	76.3	57.568	45.1756	45.1756	46.2318	44.7038	6.3978	6.3978	2.6443	31.1244	31.1244	12.8642	100	0	0.0443325	-21.6764	36.4853
NGFC-6	[104]	$2007	Low pressure autothermal reforming (ATR)-six parallel SOFC sections.	550	56.3	6394.32	77.9	77.9	53.8376	38.1913	38.1913	38.1913	36.9291	6.21	6.21	2.6443	39.7087	39.7087	16.9085		0.0003	0.0585701	-26.2362	28.0747	47.17	47.17	PC w/o CCS
NGFC-7	[104]	$2007	Low pressure ATR-eight parallel SOFC sections. ASU oxidant capacity is 58% smaller than the previous case	550	61.8	5825.24	62.6	62.6	40.9556	26.4252	26.4252	26.4252	25.5519	6.21	6.21	2.6443	36.1748	36.1748	15.4037		0.0003	0.0533843	-40.5417	-5.59186	9.14918	9.14918	PC w/o CCS
NGFC-8	[104]	$2007	High pressure ATR	550	64.8	5555.56	67.8	67.8	46.89	33.3	33.3	33.3	32.1994	6.21	6.21	2.6443	34.5	34.5	14.6906		0.0044	0.0550267	-33.9437	9.78568	22.2667	22.2667	PC w/o CCS
NGFC-9	[104]	$2007	High pressure ATR- ASU oxidant capacity is 58% smaller than the previous case	550	64.8	5555.56	65.3	65.3	44.4726	30.8	30.8	30.8	29.7821	6.21	6.21	2.6443	34.5	34.5	14.6906		0.0044	0.0550267	-36.6619	3.51195	15.9835	15.9835	PC w/o CCS
NGFC-10	[104]	$2007	No ATR	550	65.9	5462.82	61.2	61.2	40.8197	27.2759	27.2759	27.2759	26.3744	6.21	6.21	2.6443	33.9241	33.9241	14.4453		0.0003	0.0500816	-40.5438	-5.89259	5.62179	5.62179	PC w/o CCS
NCLC-1	[105]	$2002	NG Chemical Looping Combustion	340.66	46.94	7669.37	41.2	41.2	60.6047	20.301	20.301	19.3514	40.3246	2.725	2.725	2.6443	20.899	20.899	20.2801	98	0.0076	0.0774894	-19.0024	48.1883	18.55	18.55	NGCC w/o CCS
* Unfortunately, the reference was erroneously ommitted in the original paper. The missing reference is:
Haslbeck, J.L.; Zhang C.; Brasington R.D.; Woods M.C.; Lewis E.G.; Black J.; Kyle A.; Turner M. Cost and Performance for Low-Rank Pulverized Coal Oxycombustion Energy Plants; DOE. NETL-401/093010; National Technology Laboratory: Pittsburg, PA, USA, 2010.
